# Supplementary material for: Aescin – a natural soap for the formation of lipid nanodiscs with tunable size
Source: Royal Society of Chemistry journal article supplement (doi:10.1039/d0sm02043e), 2020-12-16
Supplement: d0sm02043e1.pdf [file d0sm02043e1.pdf]

## Electronic Supplementary Information

# Aescin - a natural soap for the formation of lipid nanodiscs with tunable size

Ramsia Geisler,<sup>\*a‡</sup> Martin Cramer Pedersen,<sup>b</sup> Natalie Preisig,<sup>c</sup> Yvonne Hannappel,<sup>c</sup> Sylvain Prévost,<sup>d ¶</sup> Rajeev Dattani,<sup>d</sup> Lise Arleth<sup>b</sup> and Thomas Hellweg<sup>a</sup>

<sup>a</sup> Physical and Biophysical Chemistry, Bielefeld University, Universitätsstr. 25, 33615 Bielefeld, Germany. Tel: +49-(0)6151 16 24501. E-mail: ramsia@geisler.digital

<sup>b</sup> Niels Bohr Institute, University of Copenhagen, Universitetsparken 5, 2100 Copenhagen, Denmark

<sup>c</sup> Institute for Physical Chemistry, University of Stuttgart, Pfaffenwaldring 55, 70569 Stuttgart, Germany.

<sup>d</sup> ESRF-The European Synchrotron, 71, Avenue des Martyrs, 38000 Grenoble Cedex 9, France

‡ Current address: Soft Matter at Interfaces, Technical University of Darmstadt, Hochschulstrasse 8, 64289 Darmstadt, Germany.

¶ Current address: Institut Laue-Langevin, DS/LSS, 71, Avenue des Martyrs, 38000 Grenoble Cedex 9, France.

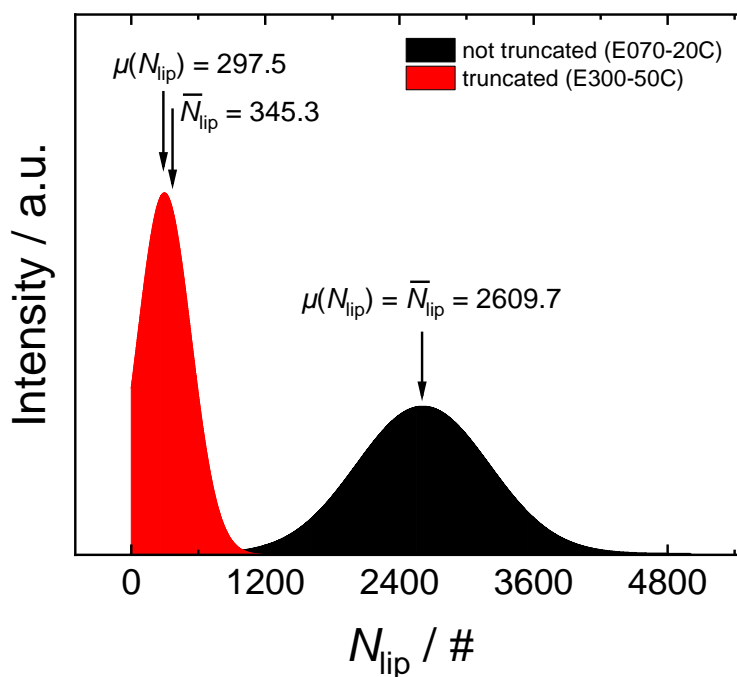

**Fig. S1** Exemplary distributions of the number of lipids  $N_{lip}$ . The red curve illustrates a normal distribution truncated at zero. The black curve indicates a not-truncated normal distribution. The mean number of lipids ( $\bar{N}_{lip}$ ) varies from the maximum of the normal distribution  $\mu_{N(lip)}$  in a truncated distribution.

**Table S1** Parameters of the *polydisperse disc* model.  $\chi^2$ : goodness of fit;  $w_{\text{rim}}$ : width of rim;  $A_{\text{PC head}}$ : area per lipid headgroup;  $h_{\text{rim}}$ : height of rim;  $\mu_{N_{\text{lip}}}$ : peak maximum of the distribution of the number of lipids;  $\sigma(N_{\text{lip}})$ : mean deviation of  $N(\text{lip})$ ;  $N(\text{water/PC head})$ : number of water molecules per lipid head group;  $V_m$ : partial molar volume; BackX: background; ScaleX: scale;  $\Delta\rho_{\text{heads}}$ : excess scattering length densities of DMPC head groups;  $\Delta\rho_{\text{alkyl}}$ : excess scattering length densities of DMPC alkyl chains;  $\Delta\rho_{\text{me}}$ : excess scattering length densities of DMPC methyl groups;  $\Delta\rho_{\text{rim}}$ : excess scattering length densities of  $\beta$ -aescin rim;  $h_{\text{bl}}$ : height of bilayer;  $h_{\text{al}}$ : height of alkyl layer ( $\text{CH}_2$  groups);  $h_{\text{me}}$ : height of methyl layer;  $\bar{N}_{\text{lip}}$ : mean number of lipids;  $r_{\text{core}}$  for  $\bar{N}_{\text{lip}}$ : radius of lipid bilayer (without rim) derived from the mean number of lipids.

|          | $\chi^2$ | $w_{\text{rim}}$ | $A_{\text{PC head}}$ | $h_{\text{rim}}$ | $\mu_{N(\text{lip})}$ | $\sigma(N(\text{lip}))$ |
|----------|----------|------------------|----------------------|------------------|-----------------------|-------------------------|
|          | -        | Å                | Å <sup>2</sup>       | Å                | #                     | #                       |
| E070-10C | 30.6     | 18.76 ± 18.40    | 46.28 ± 3.17         | 15.47 ± 19.45    | 3035.2 ± 267.6        | 702.0 ± 10.1            |
| E070-15C | 31.7     | 18.75 ± 20.60    | 46.45 ± 3.23         | 15.32 ± 21.93    | 3105.9 ± 331.3        | 735.5 ± 14.0            |
| E070-20C | 56.0     | 11.71 ± 17.43    | 47.69 ± 4.07         | 23.43 ± 9.39     | 2609.7 ± 202.8        | 585.9 ± 8.4             |
| E100-10C | 0.9      | 14.96 ± 8.42     | 47.62 ± 2.52         | 28.10 ± 19.21    | 1637.2 ± 364.2        | 396.0 ± 61.7            |
| E100-15C | 0.9      | 14.40 ± 8.08     | 48.13 ± 2.73         | 27.51 ± 17.95    | 1669.1 ± 364.5        | 413.1 ± 59.2            |
| E100-20C | 5.6      | 12.67 ± 7.40     | 49.10 ± 2.71         | 28.32 ± 18.41    | 1558.7 ± 288.7        | 391.2 ± 43.4            |
| E100-25C | 6.7      | 7.77 ± 11.82     | 52.53 ± 3.68         | 28.26 ± 15.70    | 3104.7 ± 975.3        | 988.2 ± 150.6           |
| E100-30C | 7.0      | 4.62 ± 25.68     | 54.05 ± 4.90         | 26.86 ± 12.56    | 9339.7 ± 2758.7       | 3229.7 ± 401.7          |
| E100-35C | 4.3      | 5.69 ± 28.72     | 56.91 ± 11.4         | 24.77 ± 15.05    | 11566.5 ± 2941.1      | 2992.3 ± 512.6          |
| E100-40C | 12.8     | 5.63 ± 21.44     | 55.22 ± 9.79         | 20.44 ± 7.29     | 14103.0 ± 2469.2      | 4283.1 ± 270.4          |
| E100-45C | 7.8      | 6.61 ± 18.15     | 57.14 ± 12.0         | 22.99 ± 14.83    | 14403.1 ± 3276.5      | 3978.1 ± 425.9          |
| E100-50C | 22.4     | 6.36 ± 13.42     | 56.75 ± 9.97         | 20.00 ± 7.40     | 13299.3 ± 2549.0      | 3964.5 ± 320.7          |
| E150-10C | 1.9      | 16.30 ± 5.20     | 46.99 ± 2.32         | 28.49 ± 13.30    | 953.3 ± 211.3         | 248.0 ± 32.4            |
| E150-15C | 1.2      | 15.33 ± 5.73     | 47.51 ± 2.35         | 28.88 ± 15.69    | 1009.4 ± 221.5        | 280.2 ± 31.0            |
| E150-20C | 1.5      | 13.81 ± 6.84     | 48.75 ± 2.89         | 29.02 ± 19.37    | 971.1 ± 198.8         | 280.3 ± 25.7            |
| E150-25C | 2.4      | 13.21 ± 4.54     | 51.37 ± 2.88         | 25.42 ± 11.27    | 1233.7 ± 302.0        | 362.6 ± 43.5            |
| E150-30C | 3.7      | 11.57 ± 9.57     | 55.99 ± 6.29         | 26.08 ± 25.97    | 3168.1 ± 1066.8       | 1085.4 ± 212.0          |
| E150-35C | 3.4      | 13.00 ± 6.30     | 55.76 ± 7.26         | 20.72 ± 10.27    | 5618.9 ± 2382.2       | 1828.4 ± 409.0          |
| E150-40C | 2.1      | 11.23 ± 5.96     | 57.98 ± 13.37        | 21.46 ± 12.55    | 10910.6 ± 6696.2      | 3491.4 ± 1487.9         |
| E150-45C | 1.9      | 11.72 ± 5.61     | 60.44 ± 18.75        | 21.35 ± 13.52    | 12216.5 ± 7884.5      | 3920.3 ± 1763.8         |
| E150-50C | 1.5      | 11.65 ± 8.98     | 62.57 ± 18.09        | 23.7 ± 34.08     | 8924.8 ± 5210.9       | 4890.8 ± 1882.2         |
| E200-10C | 0.5      | 32.99 ± 9.40     | 48.26 ± 3.69         | 17.78 ± 5.27     | 458.8 ± 166.7         | 146.6 ± 22.2            |
| E200-15C | 1.0      | 30.40 ± 10.57    | 48.04 ± 3.92         | 17.05 ± 13.7     | 491.6 ± 185.3         | 162.0 ± 35.3            |
| E200-20C | 1.2      | 16.59 ± 4.25     | 48.65 ± 2.49         | 30.37 ± 13.4     | 593.5 ± 144.5         | 200.5 ± 21.1            |
| E200-25C | 2.4      | 29.56 ± 9.08     | 51.17 ± 3.09         | 15.46 ± 19.3     | 510.8 ± 169.3         | 169.4 ± 30.3            |
| E200-30C | 4.6      | 28.07 ± 11.31    | 54.75 ± 3.72         | 13.68 ± 3.24     | 974.7 ± 305.8         | 322.6 ± 17.2            |
| E200-35C | 3.2      | 27.75 ± 16.76    | 56.52 ± 7.10         | 13.15 ± 4.09     | 2669.1 ± 1222.0       | 1556.9 ± 537.3          |
| E200-40C | 2.6      | 28.14 ± 24.62    | 58.68 ± 12.80        | 11.66 ± 5.27     | 5708.8 ± 3631.7       | 2766.5 ± 1194.1         |
| E200-45C | 2.4      | 26.58 ± 20.55    | 60.69 ± 13.18        | 12.53 ± 4.52     | 3521.4 ± 1942.4       | 1582.5 ± 569.3          |
| E200-50C | 2.7      | 24.34 ± 9.52     | 60.49 ± 7.08         | 14.50 ± 3.40     | 2755.1 ± 1632.4       | 1901.6 ± 1103.3         |
| E300-10C | 1.1      | 18.87 ± 3.91     | 48.61 ± 4.62         | 36.62 ± 25.4     | 193.4 ± 87.3          | 85.5 ± 22.8             |
| E300-15C | 1.5      | 29.65 ± 6.24     | 48.38 ± 4.69         | 17.79 ± 5.97     | 165.1 ± 83.1          | 52.5 ± 27.6             |
| E300-20C | 1.5      | 28.77 ± 5.22     | 49.22 ± 4.05         | 17.22 ± 5.17     | 178.5 ± 79.6          | 57.1 ± 24.1             |
| E300-25C | 1.4      | 18.29 ± 6.50     | 52.25 ± 4.32         | 40.30 ± 26.8     | 220.2 ± 94.8          | 120.6 ± 27.1            |
| E300-30C | 2.0      | 27.04 ± 6.12     | 54.46 ± 6.98         | 17.81 ± 6.00     | 231.7 ± 92.4          | 98.0 ± 24.9             |
| E300-35C | 2.7      | 26.98 ± 8.14     | 55.89 ± 9.24         | 18.07 ± 8.50     | 281.5 ± 133.3         | 128.3 ± 36.0            |
| E300-40C | 2.4      | 26.36 ± 7.12     | 56.71 ± 8.64         | 18.56 ± 9.11     | 303.2 ± 127.8         | 151.2 ± 38.1            |
| E300-45C | 2.1      | 25.07 ± 5.05     | 56.79 ± 6.10         | 19.68 ± 9.02     | 324.5 ± 123.4         | 201.9 ± 54.8            |
| E300-50C | 1.8      | 24.33 ± 6.43     | 58.00 ± 6.93         | 20.81 ± 13.0     | 297.5 ± 166.6         | 238.6 ± 139.5           |

|          | $N(\text{water/PC head})$<br># | $V_m$ of $\beta$ -aescin<br>$\text{\AA}^3$ | $V_m$ of lipids<br>$\text{\AA}^3$ | BackX<br>$\text{cm}^{-1}$ | ScaleX<br>-         |
|----------|--------------------------------|--------------------------------------------|-----------------------------------|---------------------------|---------------------|
| E070-10C | $1.77 \pm 3.66$                | $1202 \pm 206$                             | $1051 \pm 2$                      | $-0.0014 \pm 0.0007$      | $0.2343 \pm 0.0727$ |
| E070-15C | $1.68 \pm 3.75$                | $1189 \pm 221$                             | $1058 \pm 2$                      | $-0.0022 \pm 0.0008$      | $0.2339 \pm 0.0744$ |
| E070-20C | $2.67 \pm 4.55$                | $1194 \pm 458$                             | $1066 \pm 3$                      | $-0.0022 \pm 0.0014$      | $0.2539 \pm 0.1851$ |
| E100-10C | $4.30 \pm 2.86$                | $1401 \pm 119$                             | $1057 \pm 9$                      | $-0.0007 \pm 0.0001$      | $0.7392 \pm 0.3161$ |
| E100-15C | $4.54 \pm 3.08$                | $1390 \pm 122$                             | $1062 \pm 8$                      | $-0.0008 \pm 0.0001$      | $0.6968 \pm 0.2943$ |
| E100-20C | $4.73 \pm 3.09$                | $1373 \pm 109$                             | $1073 \pm 7$                      | $-0.0005 \pm 0.0001$      | $0.6661 \pm 0.2419$ |
| E100-25C | $6.48 \pm 4.04$                | $1191 \pm 451$                             | $1080 \pm 7$                      | $-0.0004 \pm 0.0003$      | $0.3347 \pm 0.2754$ |
| E100-30C | $2.89 \pm 6.17$                | $849 \pm 2542$                             | $1093 \pm 6$                      | $-0.0005 \pm 0.0008$      | $0.1485 \pm 0.3876$ |
| E100-35C | $3.80 \pm 12.0$                | $949 \pm 2087$                             | $1098 \pm 5$                      | $-0.0008 \pm 0.0008$      | $0.1684 \pm 0.3905$ |
| E100-40C | $0.00 \pm 10.3$                | $825 \pm 1658$                             | $1103 \pm 4$                      | $-0.0006 \pm 0.0007$      | $0.1284 \pm 0.2051$ |
| E100-45C | $0.00 \pm 11.8$                | $977 \pm 984$                              | $1105 \pm 4$                      | $-0.0006 \pm 0.0005$      | $0.1482 \pm 0.1634$ |
| E100-50C | $0.00 \pm 10.4$                | $883 \pm 832$                              | $1109 \pm 4$                      | $-0.0005 \pm 0.0004$      | $0.1325 \pm 0.1106$ |
| E150-10C | $3.77 \pm 2.67$                | $1382 \pm 110$                             | $1063 \pm 11$                     | $-0.0007 \pm 0.0001$      | $0.6466 \pm 0.2605$ |
| E150-15C | $4.11 \pm 2.73$                | $1376 \pm 110$                             | $1066 \pm 10$                     | $-0.0006 \pm 0.0001$      | $0.6032 \pm 0.2437$ |
| E150-20C | $4.97 \pm 3.36$                | $1366 \pm 115$                             | $1074 \pm 9$                      | $-0.0007 \pm 0.0001$      | $0.5718 \pm 0.2274$ |
| E150-25C | $6.30 \pm 3.03$                | $1339 \pm 113$                             | $1080 \pm 9$                      | $-0.0007 \pm 0.0001$      | $0.4596 \pm 0.1840$ |
| E150-30C | $7.18 \pm 6.86$                | $1262 \pm 166$                             | $1087 \pm 9$                      | $-0.0006 \pm 0.0001$      | $0.2724 \pm 0.1556$ |
| E150-35C | $5.06 \pm 8.84$                | $1162 \pm 184$                             | $1090 \pm 8$                      | $-0.0009 \pm 0.0002$      | $0.1948 \pm 0.1098$ |
| E150-40C | $5.57 \pm 15.0$                | $1069 \pm 253$                             | $1092 \pm 8$                      | $-0.0010 \pm 0.0002$      | $0.1465 \pm 0.1011$ |
| E150-45C | $6.30 \pm 19.9$                | $1070 \pm 294$                             | $1094 \pm 8$                      | $-0.0011 \pm 0.0002$      | $0.1485 \pm 0.1197$ |
| E150-50C | $7.80 \pm 17.2$                | $1024 \pm 493$                             | $1096 \pm 9$                      | $-0.0009 \pm 0.0002$      | $0.1241 \pm 0.1304$ |
| E200-10C | $5.38 \pm 3.35$                | $1451 \pm 179$                             | $1069 \pm 16$                     | $-0.0001 \pm 0.0000$      | $0.0894 \pm 0.0706$ |
| E200-15C | $4.97 \pm 5.28$                | $1405 \pm 374$                             | $1073 \pm 14$                     | $-0.0001 \pm 0.0000$      | $0.0724 \pm 0.0835$ |
| E200-20C | $5.19 \pm 2.90$                | $1393 \pm 123$                             | $1078 \pm 14$                     | $-0.0001 \pm 0.0000$      | $0.0593 \pm 0.0253$ |
| E200-25C | $6.42 \pm 3.76$                | $1420 \pm 454$                             | $1084 \pm 13$                     | $-0.0001 \pm 0.0000$      | $0.0677 \pm 0.0842$ |
| E200-30C | $6.66 \pm 4.10$                | $1338 \pm 189$                             | $1088 \pm 10$                     | $-0.0001 \pm 0.0000$      | $0.0431 \pm 0.0248$ |
| E200-35C | $7.52 \pm 7.84$                | $1151 \pm 317$                             | $1088 \pm 12$                     | $-0.0001 \pm 0.0000$      | $0.0182 \pm 0.0144$ |
| E200-40C | $8.46 \pm 14.0$                | $1076 \pm 431$                             | $1088 \pm 12$                     | $-0.0001 \pm 0.0000$      | $0.0139 \pm 0.0146$ |
| E200-45C | $9.30 \pm 14.0$                | $1148 \pm 409$                             | $1093 \pm 11$                     | $-0.0001 \pm 0.0000$      | $0.0180 \pm 0.0190$ |
| E200-50C | $7.57 \pm 7.69$                | $1122 \pm 273$                             | $1100 \pm 10$                     | $-0.0001 \pm 0.0000$      | $0.0153 \pm 0.0096$ |
| E300-10C | $5.37 \pm 4.04$                | $1429 \pm 182$                             | $1107 \pm 41$                     | $-0.0011 \pm 0.0002$      | $0.7477 \pm 0.5206$ |
| E300-15C | $4.27 \pm 6.72$                | $1406 \pm 214$                             | $1104 \pm 24$                     | $-0.0010 \pm 0.0001$      | $0.7755 \pm 0.6455$ |
| E300-20C | $4.37 \pm 5.91$                | $1381 \pm 186$                             | $1111 \pm 23$                     | $-0.0010 \pm 0.0002$      | $0.6826 \pm 0.4653$ |
| E300-25C | $6.15 \pm 4.31$                | $1437 \pm 136$                             | $1133 \pm 44$                     | $-0.0010 \pm 0.0002$      | $0.6801 \pm 0.3717$ |
| E300-30C | $4.88 \pm 7.99$                | $1342 \pm 275$                             | $1127 \pm 26$                     | $-0.0010 \pm 0.0002$      | $0.5263 \pm 0.4797$ |
| E300-35C | $6.25 \pm 9.39$                | $1352 \pm 354$                             | $1117 \pm 24$                     | $-0.0013 \pm 0.0003$      | $0.4978 \pm 0.5715$ |
| E300-40C | $6.46 \pm 8.65$                | $1350 \pm 321$                             | $1117 \pm 24$                     | $-0.0014 \pm 0.0003$      | $0.4644 \pm 0.4709$ |
| E300-45C | $5.48 \pm 6.91$                | $1323 \pm 245$                             | $1120 \pm 24$                     | $-0.0011 \pm 0.0003$      | $0.3872 \pm 0.2627$ |
| E300-50C | $7.03 \pm 7.76$                | $1355 \pm 282$                             | $1120 \pm 24$                     | $-0.0011 \pm 0.0003$      | $0.3963 \pm 0.3052$ |

|          | $\Delta\rho_{\text{heads}}$<br>$\text{cm}/\text{\AA}^3$ | $\Delta\rho_{\text{alkyl}}$<br>$\text{cm}/\text{\AA}^3$ | $\Delta\rho_{\text{methyl}}$<br>$\text{cm}/\text{\AA}^3$ | $\Delta\rho_{\text{rim}}$<br>$\text{cm}/\text{\AA}^3$ | $h_{\text{bl}}$<br>$\text{\AA}$ | $h_{\text{al}}$<br>$\text{\AA}$ | $h_{\text{me}}$<br>$\text{\AA}$ | $\bar{N}_{\text{lip}}$<br># | $r_{\text{core}}$ for $\bar{N}_{\text{lip}}$<br>$\text{\AA}$ |
|----------|---------------------------------------------------------|---------------------------------------------------------|----------------------------------------------------------|-------------------------------------------------------|---------------------------------|---------------------------------|---------------------------------|-----------------------------|--------------------------------------------------------------|
| E070-10C | $4.03 \cdot 10^{-14}$                                   | $-5.02 \cdot 10^{-15}$                                  | $-4.88 \cdot 10^{-14}$                                   | $4.83 \cdot 10^{-14}$                                 | 47.70                           | 31.13                           | 4.86                            | 3035.2                      | 149.5                                                        |
| E070-15C | $3.99 \cdot 10^{-14}$                                   | $-5.61 \cdot 10^{-15}$                                  | $-4.91 \cdot 10^{-14}$                                   | $4.98 \cdot 10^{-14}$                                 | 47.70                           | 31.23                           | 4.87                            | 3105.9                      | 151.5                                                        |
| E070-20C | $3.62 \cdot 10^{-14}$                                   | $-6.30 \cdot 10^{-15}$                                  | $-4.95 \cdot 10^{-14}$                                   | $4.93 \cdot 10^{-14}$                                 | 48.07                           | 30.66                           | 4.78                            | 2609.7                      | 140.7                                                        |
| E100-10C | $3.31 \cdot 10^{-14}$                                   | $-5.53 \cdot 10^{-15}$                                  | $-4.91 \cdot 10^{-14}$                                   | $2.81 \cdot 10^{-14}$                                 | 49.80                           | 30.43                           | 4.75                            | 1637.2                      | 111.4                                                        |
| E100-15C | $3.22 \cdot 10^{-14}$                                   | $-6.01 \cdot 10^{-15}$                                  | $-4.93 \cdot 10^{-14}$                                   | $2.90 \cdot 10^{-14}$                                 | 49.81                           | 30.28                           | 4.72                            | 1669.1                      | 113.1                                                        |
| E100-20C | $3.09 \cdot 10^{-14}$                                   | $-6.87 \cdot 10^{-15}$                                  | $-4.97 \cdot 10^{-14}$                                   | $3.06 \cdot 10^{-14}$                                 | 49.48                           | 29.97                           | 4.68                            | 1558.7                      | 110.4                                                        |
| E100-25C | $2.73 \cdot 10^{-14}$                                   | $-7.45 \cdot 10^{-15}$                                  | $-5.00 \cdot 10^{-14}$                                   | $4.95 \cdot 10^{-14}$                                 | 48.52                           | 28.20                           | 4.40                            | 3104.7                      | 161.1                                                        |
| E100-30C | $3.30 \cdot 10^{-14}$                                   | $-8.50 \cdot 10^{-15}$                                  | $-5.06 \cdot 10^{-14}$                                   | $1.07 \cdot 10^{-13}$                                 | 43.66                           | 27.74                           | 4.33                            | 9345.1                      | 283.5                                                        |
| E100-35C | $3.06 \cdot 10^{-14}$                                   | $-8.88 \cdot 10^{-15}$                                  | $-5.08 \cdot 10^{-14}$                                   | $8.62 \cdot 10^{-14}$                                 | 42.60                           | 26.47                           | 4.13                            | 11566.5                     | 323.7                                                        |
| E100-40C | $4.01 \cdot 10^{-14}$                                   | $-9.25 \cdot 10^{-15}$                                  | $-5.10 \cdot 10^{-14}$                                   | $1.13 \cdot 10^{-13}$                                 | 39.95                           | 27.40                           | 4.27                            | 14103.0                     | 352.0                                                        |
| E100-45C | $3.99 \cdot 10^{-14}$                                   | $-9.38 \cdot 10^{-15}$                                  | $-5.10 \cdot 10^{-14}$                                   | $8.10 \cdot 10^{-14}$                                 | 38.67                           | 26.51                           | 4.14                            | 14403.1                     | 361.9                                                        |
| E100-50C | $3.94 \cdot 10^{-14}$                                   | $-9.69 \cdot 10^{-15}$                                  | $-5.12 \cdot 10^{-14}$                                   | $9.97 \cdot 10^{-14}$                                 | 39.08                           | 26.80                           | 4.18                            | 13299.3                     | 346.6                                                        |
| E150-10C | $3.38 \cdot 10^{-14}$                                   | $-6.05 \cdot 10^{-15}$                                  | $-4.93 \cdot 10^{-14}$                                   | $2.98 \cdot 10^{-14}$                                 | 50.05                           | 31.02                           | 4.84                            | 953.3                       | 84.4                                                         |
| E150-15C | $3.27 \cdot 10^{-14}$                                   | $-6.30 \cdot 10^{-15}$                                  | $-4.95 \cdot 10^{-14}$                                   | $3.03 \cdot 10^{-14}$                                 | 50.06                           | 30.77                           | 4.80                            | 1009.4                      | 87.4                                                         |
| E150-20C | $3.04 \cdot 10^{-14}$                                   | $-6.93 \cdot 10^{-15}$                                  | $-4.98 \cdot 10^{-14}$                                   | $3.12 \cdot 10^{-14}$                                 | 50.16                           | 30.20                           | 4.71                            | 971.1                       | 86.8                                                         |
| E150-25C | $2.76 \cdot 10^{-14}$                                   | $-7.43 \cdot 10^{-15}$                                  | $-5.00 \cdot 10^{-14}$                                   | $3.37 \cdot 10^{-14}$                                 | 49.40                           | 28.83                           | 4.50                            | 1233.7                      | 100.4                                                        |
| E150-30C | $2.58 \cdot 10^{-14}$                                   | $-8.01 \cdot 10^{-15}$                                  | $-5.03 \cdot 10^{-14}$                                   | $4.15 \cdot 10^{-14}$                                 | 46.53                           | 26.63                           | 4.16                            | 3169.4                      | 168.0                                                        |
| E150-35C | $2.89 \cdot 10^{-14}$                                   | $-8.26 \cdot 10^{-15}$                                  | $-5.05 \cdot 10^{-14}$                                   | $5.31 \cdot 10^{-14}$                                 | 44.56                           | 26.82                           | 4.18                            | 5618.9                      | 223.3                                                        |
| E150-40C | $2.79 \cdot 10^{-14}$                                   | $-8.42 \cdot 10^{-15}$                                  | $-5.05 \cdot 10^{-14}$                                   | $6.60 \cdot 10^{-14}$                                 | 43.44                           | 25.84                           | 4.03                            | 10910.6                     | 317.3                                                        |
| E150-45C | $2.66 \cdot 10^{-14}$                                   | $-8.53 \cdot 10^{-15}$                                  | $-5.06 \cdot 10^{-14}$                                   | $6.58 \cdot 10^{-14}$                                 | 42.45                           | 24.82                           | 3.87                            | 12216.5                     | 342.8                                                        |
| E150-50C | $2.44 \cdot 10^{-14}$                                   | $-8.70 \cdot 10^{-15}$                                  | $-5.07 \cdot 10^{-14}$                                   | $7.30 \cdot 10^{-14}$                                 | 42.50                           | 24.02                           | 3.75                            | 9284.8                      | 304.1                                                        |
| E200-10C | $3.00 \cdot 10^{-14}$                                   | $-6.57 \cdot 10^{-15}$                                  | $-4.96 \cdot 10^{-14}$                                   | $2.39 \cdot 10^{-14}$                                 | 50.99                           | 30.38                           | 4.74                            | 458.8                       | 59.4                                                         |
| E200-15C | $3.04 \cdot 10^{-14}$                                   | $-6.91 \cdot 10^{-15}$                                  | $-4.98 \cdot 10^{-14}$                                   | $2.77 \cdot 10^{-14}$                                 | 50.90                           | 30.64                           | 4.78                            | 491.6                       | 61.3                                                         |
| E200-20C | $2.96 \cdot 10^{-14}$                                   | $-7.30 \cdot 10^{-15}$                                  | $-5.00 \cdot 10^{-14}$                                   | $2.88 \cdot 10^{-14}$                                 | 50.73                           | 30.39                           | 4.74                            | 593.6                       | 67.8                                                         |
| E200-25C | $2.72 \cdot 10^{-14}$                                   | $-7.75 \cdot 10^{-15}$                                  | $-5.02 \cdot 10^{-14}$                                   | $2.65 \cdot 10^{-14}$                                 | 49.89                           | 29.05                           | 4.53                            | 510.8                       | 64.5                                                         |
| E200-30C | $2.65 \cdot 10^{-14}$                                   | $-8.08 \cdot 10^{-15}$                                  | $-5.04 \cdot 10^{-14}$                                   | $3.39 \cdot 10^{-14}$                                 | 47.05                           | 27.26                           | 4.25                            | 974.7                       | 92.1                                                         |
| E200-35C | $2.53 \cdot 10^{-14}$                                   | $-8.08 \cdot 10^{-15}$                                  | $-5.04 \cdot 10^{-14}$                                   | $5.46 \cdot 10^{-14}$                                 | 46.49                           | 26.40                           | 4.12                            | 2811.5                      | 159.0                                                        |
| E200-40C | $2.41 \cdot 10^{-14}$                                   | $-8.10 \cdot 10^{-15}$                                  | $-5.04 \cdot 10^{-14}$                                   | $6.49 \cdot 10^{-14}$                                 | 45.74                           | 25.43                           | 3.97                            | 5830.4                      | 233.3                                                        |
| E200-45C | $2.28 \cdot 10^{-14}$                                   | $-8.46 \cdot 10^{-15}$                                  | $-5.06 \cdot 10^{-14}$                                   | $5.49 \cdot 10^{-14}$                                 | 45.21                           | 24.70                           | 3.85                            | 3568.1                      | 185.7                                                        |
| E200-50C | $2.45 \cdot 10^{-14}$                                   | $-9.00 \cdot 10^{-15}$                                  | $-5.08 \cdot 10^{-14}$                                   | $5.84 \cdot 10^{-14}$                                 | 43.87                           | 24.93                           | 3.89                            | 3033.1                      | 170.9                                                        |
| E300-10C | $2.71 \cdot 10^{-14}$                                   | $-9.57 \cdot 10^{-15}$                                  | $-5.11 \cdot 10^{-14}$                                   | $2.57 \cdot 10^{-14}$                                 | 52.18                           | 31.23                           | 4.87                            | 195.7                       | 38.9                                                         |
| E300-15C | $2.92 \cdot 10^{-14}$                                   | $-9.34 \cdot 10^{-15}$                                  | $-5.10 \cdot 10^{-14}$                                   | $2.77 \cdot 10^{-14}$                                 | 50.93                           | 31.30                           | 4.88                            | 165.1                       | 35.7                                                         |
| E300-20C | $2.85 \cdot 10^{-14}$                                   | $-9.85 \cdot 10^{-15}$                                  | $-5.13 \cdot 10^{-14}$                                   | $2.98 \cdot 10^{-14}$                                 | 50.46                           | 30.95                           | 4.83                            | 178.5                       | 37.4                                                         |
| E300-25C | $2.41 \cdot 10^{-14}$                                   | $-1.15 \cdot 10^{-14}$                                  | $-5.21 \cdot 10^{-14}$                                   | $2.50 \cdot 10^{-14}$                                 | 50.41                           | 29.73                           | 4.64                            | 229.0                       | 42.6                                                         |
| E300-30C | $2.64 \cdot 10^{-14}$                                   | $-1.10 \cdot 10^{-14}$                                  | $-5.19 \cdot 10^{-14}$                                   | $3.35 \cdot 10^{-14}$                                 | 46.75                           | 28.37                           | 4.43                            | 233.7                       | 45.0                                                         |
| E300-35C | $2.50 \cdot 10^{-14}$                                   | $-1.03 \cdot 10^{-14}$                                  | $-5.15 \cdot 10^{-14}$                                   | $3.25 \cdot 10^{-14}$                                 | 46.70                           | 27.42                           | 4.28                            | 285.6                       | 50.4                                                         |
| E300-40C | $2.48 \cdot 10^{-14}$                                   | $-1.03 \cdot 10^{-14}$                                  | $-5.15 \cdot 10^{-14}$                                   | $3.25 \cdot 10^{-14}$                                 | 46.22                           | 27.00                           | 4.21                            | 310.8                       | 53.0                                                         |
| E300-45C | $2.60 \cdot 10^{-14}$                                   | $-1.05 \cdot 10^{-14}$                                  | $-5.16 \cdot 10^{-14}$                                   | $3.51 \cdot 10^{-14}$                                 | 45.24                           | 27.05                           | 4.22                            | 346.9                       | 56.0                                                         |
| E300-50C | $2.38 \cdot 10^{-14}$                                   | $-1.05 \cdot 10^{-14}$                                  | $-5.16 \cdot 10^{-14}$                                   | $3.22 \cdot 10^{-14}$                                 | 45.89                           | 26.48                           | 4.13                            | 345.3                       | 56.5                                                         |

**Table S2** Parameters of the *ribbon* model.  $\chi^2$ : goodness of fit; Scaling: scale parameter; Background;  $A(\text{lipid})$ : Area per lipid head group;  $V_m$ : partial molar volume; Axis Ratio ( $c/b$ ): axial ratio between the ribbon sides  $c_{\text{ribbon}}/b_{\text{ribbon}}$ ; Roughness: roughness of lipid bilayer;  $\Delta\rho_{\text{shell}}$ : excess scattering length densities of the shell (DMPC head groups +  $\beta$ -aescin molecule);  $\Delta\rho_{\text{core}}$ : excess scattering length densities of core (DMPC alkyl chains);  $h_{\text{core}}$ : height of alkyl chain layer;  $\mu(N_{\text{lip}})$ : peak of the distribution of the number of lipids  $N_{\text{lip}}$ ;  $\bar{N}_{\text{lip}}$ : mean number of lipids;  $c_{\text{core}} = c_{\text{ribbon}} - 2t_{\text{shell}}$ : length of ribbon core for  $N_{\text{lip}}$ (mean);  $b_{\text{core}} = b_{\text{ribbon}} - 2t_{\text{shell}}$  for  $\bar{N}_{\text{lip}}$ : width of ribbon core;  $t_{\text{shell}}$  for  $\bar{N}_{\text{lip}}$ : thickness of shell.

|          | $\chi^2$ | Scaling              | Background              | $A(\text{lipid})$  | $V_m$ of lipids |
|----------|----------|----------------------|-------------------------|--------------------|-----------------|
|          | -        | -                    | $10^{-3}\text{cm}^{-1}$ | $\text{\AA}^2$     | $\text{\AA}^3$  |
| E070-10C | 112.5    | $0.0022 \pm 0.0002$  | $0.0025 \pm 0.0001$     | $55.70 \pm 0.80$   | $1080 \pm 2$    |
| E070-15C | 58.2     | $0.0023 \pm 0.0002$  | $0.0032 \pm 0.0001$     | $54.97 \pm 0.64$   | $1083 \pm 2$    |
| E070-20C | 106.1    | $0.0025 \pm 0.0002$  | $0.0033 \pm 0.0001$     | $55.14 \pm 0.64$   | $1086 \pm 2$    |
| E100-10C | 16.4     | $0.0264 \pm 0.0304$  | $0.0009 \pm 0.0001$     | $50.39 \pm 3.19$   | $1073 \pm 9$    |
| E100-15C | 14.0     | $0.0260 \pm 0.0579$  | $0.0010 \pm 0.0001$     | $50.70 \pm 2.79$   | $1082 \pm 8$    |
| E100-20C | 20.5     | $0.0305 \pm 0.0641$  | $0.0007 \pm 0.0001$     | $52.28 \pm 2.69$   | $1089 \pm 7$    |
| E100-25C | 21.5     | $0.0110 \pm 0.0148$  | $0.0007 \pm 0.0001$     | $56.03 \pm 2.98$   | $1098 \pm 5$    |
| E100-30C | 16.1     | $0.0100 \pm 0.0006$  | $0.0007 \pm 0.0001$     | $60.26 \pm 1.85$   | $1114 \pm 2$    |
| E100-35C | 9.4      | $0.0064 \pm 0.0075$  | $0.0010 \pm 0.0001$     | $63.90 \pm 3.02$   | $1121 \pm 4$    |
| E100-40C | 17.6     | $0.0027 \pm 0.0023$  | $0.0009 \pm 0.0001$     | $65.83 \pm 2.12$   | $1129 \pm 4$    |
| E100-45C | 12.2     | $0.0002 \pm 0.0001$  | $0.0008 \pm 0.0001$     | $75.55 \pm 2.63$   | $1197 \pm 6$    |
| E100-50C | 28.7     | $0.0023 \pm 0.0017$  | $0.0007 \pm 0.0001$     | $68.11 \pm 1.78$   | $1133 \pm 3$    |
| E150-10C | 14.2     | $0.0665 \pm 0.0689$  | $0.0009 \pm 0.0001$     | $50.97 \pm 3.02$   | $1082 \pm 9$    |
| E150-15C | 11.9     | $0.0629 \pm 0.0615$  | $0.0008 \pm 0.0001$     | $51.47 \pm 2.91$   | $1086 \pm 8$    |
| E150-20C | 9.5      | $0.0642 \pm 0.0719$  | $0.0009 \pm 0.0001$     | $52.93 \pm 3.14$   | $1094 \pm 8$    |
| E150-25C | 6.2      | $0.0451 \pm 0.1067$  | $0.0010 \pm 0.0001$     | $56.33 \pm 3.48$   | $1108 \pm 7$    |
| E150-30C | 4.6      | $0.0270 \pm 0.0397$  | $0.0008 \pm 0.0001$     | $60.52 \pm 3.53$   | $1119 \pm 6$    |
| E150-35C | 5.4      | $0.0140 \pm 0.0196$  | $0.0010 \pm 0.0001$     | $63.85 \pm 3.89$   | $1134 \pm 6$    |
| E150-40C | 4.6      | $0.0108 \pm 0.0118$  | $0.0011 \pm 0.0001$     | $64.59 \pm 3.84$   | $1126 \pm 6$    |
| E150-45C | 3.5      | $0.0114 \pm 0.0101$  | $0.0012 \pm 0.0001$     | $67.02 \pm 3.61$   | $1130 \pm 6$    |
| E150-50C | 3.3      | $0.0195 \pm 0.0140$  | $0.0011 \pm 0.0001$     | $69.21 \pm 3.80$   | $1133 \pm 6$    |
| E200-10C | 6.8      | $0.0056 \pm 0.0057$  | $0.0001 \pm 0.0000$     | $50.98 \pm 3.59$   | $1086 \pm 10$   |
| E200-15C | 7.0      | $0.0066 \pm 0.0102$  | $0.0001 \pm 0.0000$     | $51.36 \pm 3.38$   | $1090 \pm 10$   |
| E200-20C | 8.1      | $0.0080 \pm 0.0170$  | $0.0001 \pm 0.0000$     | $53.02 \pm 3.44$   | $1098 \pm 9$    |
| E200-25C | 5.9      | $0.0125 \pm 0.0161$  | $0.0001 \pm 0.0000$     | $55.82 \pm 3.54$   | $1110 \pm 8$    |
| E200-30C | 5.2      | $0.0067 \pm 0.0096$  | $0.0001 \pm 0.0000$     | $59.57 \pm 3.33$   | $1121 \pm 7$    |
| E200-35C | 2.9      | $0.0039 \pm 0.0070$  | $0.0001 \pm 0.0000$     | $62.22 \pm 4.08$   | $1128 \pm 7$    |
| E200-40C | 3.2      | $0.0032 \pm 0.0036$  | $0.0001 \pm 0.0000$     | $65.23 \pm 5.11$   | $1133 \pm 7$    |
| E200-45C | 3.0      | $0.0039 \pm 0.0043$  | $0.0001 \pm 0.0000$     | $67.30 \pm 4.97$   | $1135 \pm 8$    |
| E200-50C | 3.4      | $0.0051 \pm 0.0063$  | $0.0001 \pm 0.0000$     | $66.96 \pm 4.17$   | $1136 \pm 6$    |
| E300-10C | 7.5      | $0.6409 \pm 4.7968$  | $0.0015 \pm 0.0001$     | $51.47 \pm 6.91$   | $1099 \pm 15$   |
| E300-15C | 7.9      | $0.5886 \pm 4.2984$  | $0.0013 \pm 0.0001$     | $51.75 \pm 7.02$   | $1101 \pm 16$   |
| E300-20C | 7.0      | $0.5505 \pm 4.0196$  | $0.0013 \pm 0.0001$     | $52.92 \pm 7.70$   | $1107 \pm 17$   |
| E300-25C | 5.3      | $0.3901 \pm 2.4223$  | $0.0013 \pm 0.0001$     | $55.32 \pm 6.53$   | $1114 \pm 13$   |
| E300-30C | 4.1      | $0.3687 \pm 1.3163$  | $0.0013 \pm 0.0002$     | $58.15 \pm 5.24$   | $1122 \pm 10$   |
| E300-35C | 3.4      | $0.3060 \pm 0.7680$  | $0.0017 \pm 0.0002$     | $61.51 \pm 6.37$   | $1128 \pm 13$   |
| E300-40C | 2.5      | $1.2318 \pm 9.1318$  | $0.0018 \pm 0.0002$     | $90.68 \pm 29.96$  | $1162 \pm 22$   |
| E300-45C | 3.2      | $1.4467 \pm 10.9070$ | $0.0016 \pm 0.0002$     | $96.24 \pm 33.34$  | $1165 \pm 22$   |
| E300-50C | 2.9      | $2.0761 \pm 15.7853$ | $0.0015 \pm 0.0002$     | $105.14 \pm 37.46$ | $1170 \pm 20$   |

|          | $\mu(N_{\text{lip}})$<br># | $\sigma(N_{\text{lip}})$<br># | Axis Ratio (c/b)<br>- | Roughness<br>Å |
|----------|----------------------------|-------------------------------|-----------------------|----------------|
| E070-10C | 743.7 ± 1406.6             | 22765.3 ± 2276.97             | 4.74 ± 0.43           | 4.78 ± 0.23    |
| E070-15C | 1468.6 ± 1351.8            | 19821.7 ± 2104.27             | 5.65 ± 0.49           | 4.50 ± 0.20    |
| E070-20C | 311.6 ± 1260.1             | 20114.7 ± 1732.27             | 6.64 ± 0.55           | 4.51 ± 0.20    |
| E100-10C | 159.4 ± 1735.2             | 1441.3 ± 867.5                | 3.59 ± 1.85           | 4.40 ± 0.56    |
| E100-15C | 97.7 ± 5316.8              | 1894.2 ± 2983.1               | 9.73 ± 8.38           | 4.46 ± 0.62    |
| E100-20C | 52.4 ± 4051.1              | 1651.4 ± 2059.2               | 8.14 ± 4.99           | 4.42 ± 0.52    |
| E100-25C | 655.1 ± 4182.9             | 3088.2 ± 2440.4               | 7.75 ± 5.23           | 4.08 ± 0.45    |
| E100-30C | 107.3 ± 205.9              | 4435.2 ± 229.2                | 7.42 ± 1.72           | 3.86 ± 0.30    |
| E100-35C | 0.0 ± 7363.7               | 7791.5 ± 7907.6               | 11.7 ± 10.5           | 3.92 ± 0.62    |
| E100-40C | 0.0 ± 14999.4              | 17855.1 ± 16311.6             | 9.19 ± 6.92           | 3.82 ± 0.51    |
| E100-45C | 43655.1 ± 7603.1           | 100.0 ± 38691.7               | 2.01 ± 0.42           | 1.24 ± 2.86    |
| E100-50C | 0.0 ± 14063.0              | 18774.9 ± 15649.2             | 9.75 ± 6.60           | 3.40 ± 0.42    |
| E150-10C | 14.0 ± 781.8               | 745.2 ± 355.2                 | 2.49 ± 1.31           | 4.52 ± 0.52    |
| E150-15C | 22.1 ± 800.2               | 785.5 ± 388.3                 | 2.80 ± 1.18           | 4.48 ± 0.51    |
| E150-20C | 20.3 ± 915.0               | 788.0 ± 438.5                 | 3.27 ± 1.24           | 4.40 ± 0.55    |
| E150-25C | 34.1 ± 3288.2              | 1245.4 ± 1497.6               | 6.78 ± 4.13           | 4.64 ± 0.68    |
| E150-30C | 0.0 ± 3589.4               | 2085.5 ± 2203.7               | 7.24 ± 4.69           | 4.48 ± 0.61    |
| E150-35C | 233.0 ± 3909.5             | 2823.5 ± 2386.7               | 7.34 ± 4.31           | 3.97 ± 0.61    |
| E150-40C | 531.6 ± 3912.8             | 3744.3 ± 3383.7               | 7.01 ± 5.00           | 4.00 ± 0.69    |
| E150-45C | 0.0 ± 3538.6               | 4333.6 ± 3450.6               | 4.48 ± 3.16           | 4.20 ± 0.72    |
| E150-50C | 28.7 ± 1757.0              | 2680.7 ± 1464.2               | 2.15 ± 1.30           | 4.28 ± 0.71    |
| E200-10C | 399.5 ± 387.6              | 205.7 ± 300.6                 | 1.74 ± 0.58           | 4.71 ± 0.59    |
| E200-15C | 334.2 ± 609.7              | 253.4 ± 364.5                 | 1.72 ± 0.60           | 4.61 ± 0.55    |
| E200-20C | 269.0 ± 871.7              | 296.4 ± 458.0                 | 1.95 ± 0.62           | 4.75 ± 0.55    |
| E200-25C | 0.0 ± 695.3                | 517.0 ± 291.6                 | 3.28 ± 1.52           | 4.75 ± 0.57    |
| E200-30C | 15.6 ± 1418.4              | 910.0 ± 695.8                 | 4.70 ± 2.71           | 4.58 ± 0.56    |
| E200-35C | 0.0 ± 2831.8               | 1508.2 ± 1408.1               | 6.00 ± 4.22           | 4.44 ± 0.69    |
| E200-40C | 0.0 ± 2636.8               | 1886.0 ± 1646.8               | 4.77 ± 3.69           | 4.57 ± 0.83    |
| E200-45C | 21.0 ± 1622.4              | 1517.3 ± 914.1                | 3.01 ± 1.54           | 4.58 ± 0.87    |
| E200-50C | 0.0 ± 1535.1               | 1175.2 ± 816.2                | 4.67 ± 2.94           | 4.51 ± 0.69    |
| E300-10C | 0.0 ± 1200.7               | 146.5 ± 421.4                 | 1.46 ± 1.17           | 5.13 ± 0.65    |
| E300-15C | 0.0 ± 1212.3               | 151.2 ± 424.8                 | 1.36 ± 1.39           | 4.97 ± 0.68    |
| E300-20C | 0.0 ± 1263.4               | 157.4 ± 439.7                 | 1.31 ± 1.61           | 4.92 ± 0.78    |
| E300-25C | 6.8 ± 1203.7               | 195.2 ± 386.2                 | 1.18 ± 1.99           | 4.79 ± 0.87    |
| E300-30C | 0.0 ± 810.0                | 218.8 ± 278.7                 | 1.78 ± 1.11           | 4.69 ± 0.66    |
| E300-35C | 5.9 ± 709.1                | 266.6 ± 261.1                 | 2.24 ± 1.19           | 4.85 ± 0.95    |
| E300-40C | 0.0 ± 1551.1               | 208.2 ± 525.8                 | 2.63 ± 1.29           | 6.74 ± 0.93    |
| E300-45C | 0.0 ± 1495.5               | 199.6 ± 501.8                 | 2.69 ± 1.36           | 6.78 ± 0.82    |
| E300-50C | 0.0 ± 1325.1               | 174.0 ± 447.2                 | 2.55 ± 1.21           | 6.87 ± 0.65    |

|          | $\Delta\rho_{\text{shell}}$<br>cm/Å <sup>3</sup> | $\Delta\rho_{\text{core}}$<br>cm/Å <sup>3</sup> | $h_{\text{core}}$<br>Å | $\bar{N}_{\text{lip}}$<br># | $b_{\text{core}}$ for $\bar{N}_{\text{lip}}$<br>Å | $c_{\text{core}}$ for $\bar{N}_{\text{lip}}$<br>Å | $t_{\text{shell}}$ for $\bar{N}_{\text{lip}}$<br>Å |
|----------|--------------------------------------------------|-------------------------------------------------|------------------------|-----------------------------|---------------------------------------------------|---------------------------------------------------|----------------------------------------------------|
| E070-10C | $4.05 \cdot 10^{-14}$                            | $-1.41 \cdot 10^{-14}$                          | 26.59                  | 18325.70                    | 328.45                                            | 1554.04                                           | 15.44                                              |
| E070-15C | $4.02 \cdot 10^{-14}$                            | $-1.43 \cdot 10^{-14}$                          | 27.02                  | 16232.82                    | 281.05                                            | 1587.43                                           | 15.30                                              |
| E070-20C | $3.98 \cdot 10^{-14}$                            | $-1.45 \cdot 10^{-14}$                          | 27.01                  | 16028.75                    | 257.97                                            | 1713.20                                           | 15.12                                              |
| E100-10C | $4.04 \cdot 10^{-14}$                            | $-1.35 \cdot 10^{-14}$                          | 29.19                  | 1200.73                     | 91.86                                             | 329.32                                            | 11.66                                              |
| E100-15C | $3.95 \cdot 10^{-14}$                            | $-1.42 \cdot 10^{-14}$                          | 29.27                  | 1535.06                     | 63.25                                             | 615.23                                            | 10.79                                              |
| E100-20C | $3.89 \cdot 10^{-14}$                            | $-1.48 \cdot 10^{-14}$                          | 28.57                  | 1325.94                     | 65.24                                             | 531.27                                            | 10.65                                              |
| E100-25C | $3.81 \cdot 10^{-14}$                            | $-1.54 \cdot 10^{-14}$                          | 26.88                  | 2699.09                     | 98.80                                             | 765.35                                            | 11.84                                              |
| E100-30C | $3.67 \cdot 10^{-14}$                            | $-1.65 \cdot 10^{-14}$                          | 25.35                  | 3548.62                     | 120.03                                            | 890.81                                            | 11.98                                              |
| E100-35C | $3.61 \cdot 10^{-14}$                            | $-1.70 \cdot 10^{-14}$                          | 24.07                  | 6164.31                     | 129.81                                            | 1517.13                                           | 11.92                                              |
| E100-40C | $3.54 \cdot 10^{-14}$                            | $-1.76 \cdot 10^{-14}$                          | 23.52                  | 14126.21                    | 224.99                                            | 2066.67                                           | 13.10                                              |
| E100-45C | $2.99 \cdot 10^{-14}$                            | $-2.19 \cdot 10^{-14}$                          | 21.73                  | 43655.10                    | 906.73                                            | 1818.65                                           | 13.67                                              |
| E100-50C | $3.51 \cdot 10^{-14}$                            | $-1.78 \cdot 10^{-14}$                          | 22.81                  | 14853.89                    | 227.72                                            | 2221.22                                           | 12.80                                              |
| E150-10C | $3.86 \cdot 10^{-14}$                            | $-1.42 \cdot 10^{-14}$                          | 29.12                  | 594.73                      | 78.09                                             | 194.08                                            | 10.44                                              |
| E150-15C | $3.83 \cdot 10^{-14}$                            | $-1.46 \cdot 10^{-14}$                          | 28.95                  | 629.67                      | 76.11                                             | 212.89                                            | 10.44                                              |
| E150-20C | $3.77 \cdot 10^{-14}$                            | $-1.51 \cdot 10^{-14}$                          | 28.34                  | 630.90                      | 71.51                                             | 233.49                                            | 10.21                                              |
| E150-25C | $3.66 \cdot 10^{-14}$                            | $-1.61 \cdot 10^{-14}$                          | 26.97                  | 997.91                      | 64.39                                             | 436.49                                            | 10.07                                              |
| E150-30C | $3.57 \cdot 10^{-14}$                            | $-1.69 \cdot 10^{-14}$                          | 25.36                  | 1649.97                     | 83.03                                             | 601.33                                            | 10.66                                              |
| E150-35C | $3.43 \cdot 10^{-14}$                            | $-1.79 \cdot 10^{-14}$                          | 24.36                  | 2321.46                     | 100.48                                            | 737.60                                            | 10.99                                              |
| E150-40C | $3.52 \cdot 10^{-14}$                            | $-1.74 \cdot 10^{-14}$                          | 23.92                  | 3165.69                     | 120.73                                            | 846.79                                            | 11.45                                              |
| E150-45C | $3.49 \cdot 10^{-14}$                            | $-1.76 \cdot 10^{-14}$                          | 23.13                  | 3428.57                     | 160.17                                            | 717.27                                            | 11.76                                              |
| E150-50C | $3.47 \cdot 10^{-14}$                            | $-1.78 \cdot 10^{-14}$                          | 22.45                  | 2131.38                     | 185.34                                            | 397.93                                            | 11.37                                              |
| E200-10C | $3.77 \cdot 10^{-14}$                            | $-1.45 \cdot 10^{-14}$                          | 29.21                  | 411.40                      | 77.74                                             | 134.90                                            | 9.87                                               |
| E200-15C | $3.74 \cdot 10^{-14}$                            | $-1.48 \cdot 10^{-14}$                          | 29.11                  | 379.74                      | 75.39                                             | 129.35                                            | 9.69                                               |
| E200-20C | $3.68 \cdot 10^{-14}$                            | $-1.54 \cdot 10^{-14}$                          | 28.40                  | 363.34                      | 70.36                                             | 136.88                                            | 9.45                                               |
| E200-25C | $3.59 \cdot 10^{-14}$                            | $-1.62 \cdot 10^{-14}$                          | 27.27                  | 409.05                      | 59.00                                             | 193.49                                            | 9.16                                               |
| E200-30C | $3.52 \cdot 10^{-14}$                            | $-1.70 \cdot 10^{-14}$                          | 25.81                  | 725.71                      | 67.82                                             | 318.70                                            | 9.72                                               |
| E200-35C | $3.47 \cdot 10^{-14}$                            | $-1.75 \cdot 10^{-14}$                          | 24.86                  | 1193.23                     | 78.63                                             | 472.09                                            | 10.19                                              |
| E200-40C | $3.44 \cdot 10^{-14}$                            | $-1.78 \cdot 10^{-14}$                          | 23.81                  | 1492.11                     | 100.99                                            | 481.86                                            | 10.61                                              |
| E200-45C | $3.42 \cdot 10^{-14}$                            | $-1.80 \cdot 10^{-14}$                          | 23.13                  | 1208.13                     | 116.31                                            | 349.52                                            | 10.50                                              |
| E200-50C | $3.41 \cdot 10^{-14}$                            | $-1.80 \cdot 10^{-14}$                          | 23.26                  | 929.73                      | 81.68                                             | 381.08                                            | 9.71                                               |
| E300-10C | $3.59 \cdot 10^{-14}$                            | $-1.55 \cdot 10^{-14}$                          | 29.28                  | 115.94                      | 45.27                                             | 65.92                                             | 7.23                                               |
| E300-15C | $3.58 \cdot 10^{-14}$                            | $-1.56 \cdot 10^{-14}$                          | 29.19                  | 119.62                      | 47.63                                             | 64.98                                             | 7.31                                               |
| E300-20C | $3.55 \cdot 10^{-14}$                            | $-1.60 \cdot 10^{-14}$                          | 28.68                  | 124.53                      | 50.19                                             | 65.65                                             | 7.38                                               |
| E300-25C | $3.50 \cdot 10^{-14}$                            | $-1.65 \cdot 10^{-14}$                          | 27.62                  | 156.94                      | 60.67                                             | 71.55                                             | 7.80                                               |
| E300-30C | $3.45 \cdot 10^{-14}$                            | $-1.71 \cdot 10^{-14}$                          | 26.47                  | 173.07                      | 53.11                                             | 94.74                                             | 7.79                                               |
| E300-35C | $3.42 \cdot 10^{-14}$                            | $-1.75 \cdot 10^{-14}$                          | 25.14                  | 213.14                      | 54.05                                             | 121.27                                            | 7.96                                               |
| E300-40C | $3.22 \cdot 10^{-14}$                            | $-1.97 \cdot 10^{-14}$                          | 17.57                  | 164.73                      | 53.32                                             | 140.07                                            | 6.54                                               |
| E300-45C | $3.20 \cdot 10^{-14}$                            | $-1.99 \cdot 10^{-14}$                          | 16.60                  | 157.90                      | 53.13                                             | 143.02                                            | 6.33                                               |
| E300-50C | $3.17 \cdot 10^{-14}$                            | $-2.02 \cdot 10^{-14}$                          | 15.26                  | 137.63                      | 53.31                                             | 135.72                                            | 5.97                                               |

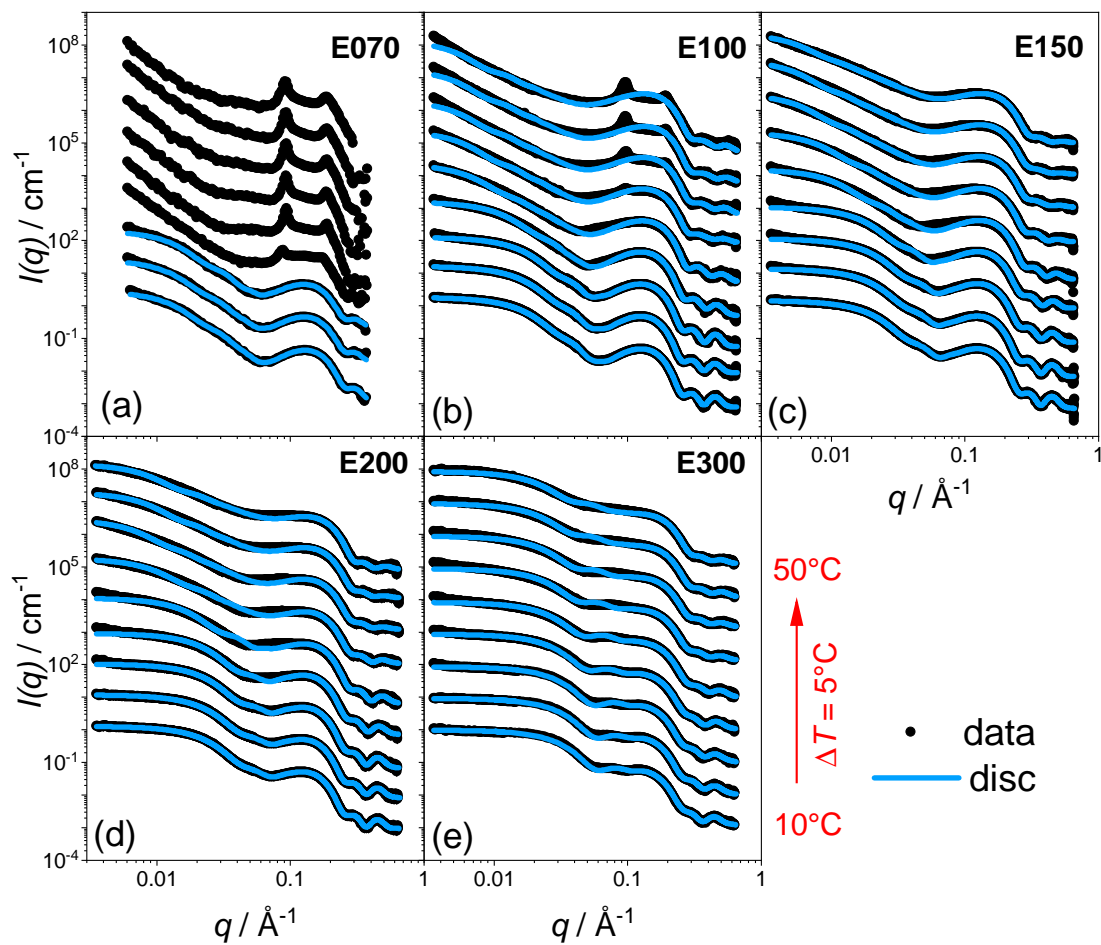

**Fig. S2** SAXS curves of samples with (a) 7 mol% , (b) 10 mol%, (c) 15 mol%, (d) 20 mol%, and (e) 30 mol%  $\beta$ -aescin at temperatures from 10-50 °C (red numbers) in steps of 5 °C. Solid lines are model fits to the data (black dots). Blue: *polydisperse disc*. The SAXS curves are scaled by multiples of 10 from bottom ( $10^0$  @ 10 °C) to top ( $10^8$  @ 50 °C). The legend and temperatures apply to all panels. The samples of E070 (panel (a)) were measured at the XEUSS instrument, all other samples at the ID02 beamline.



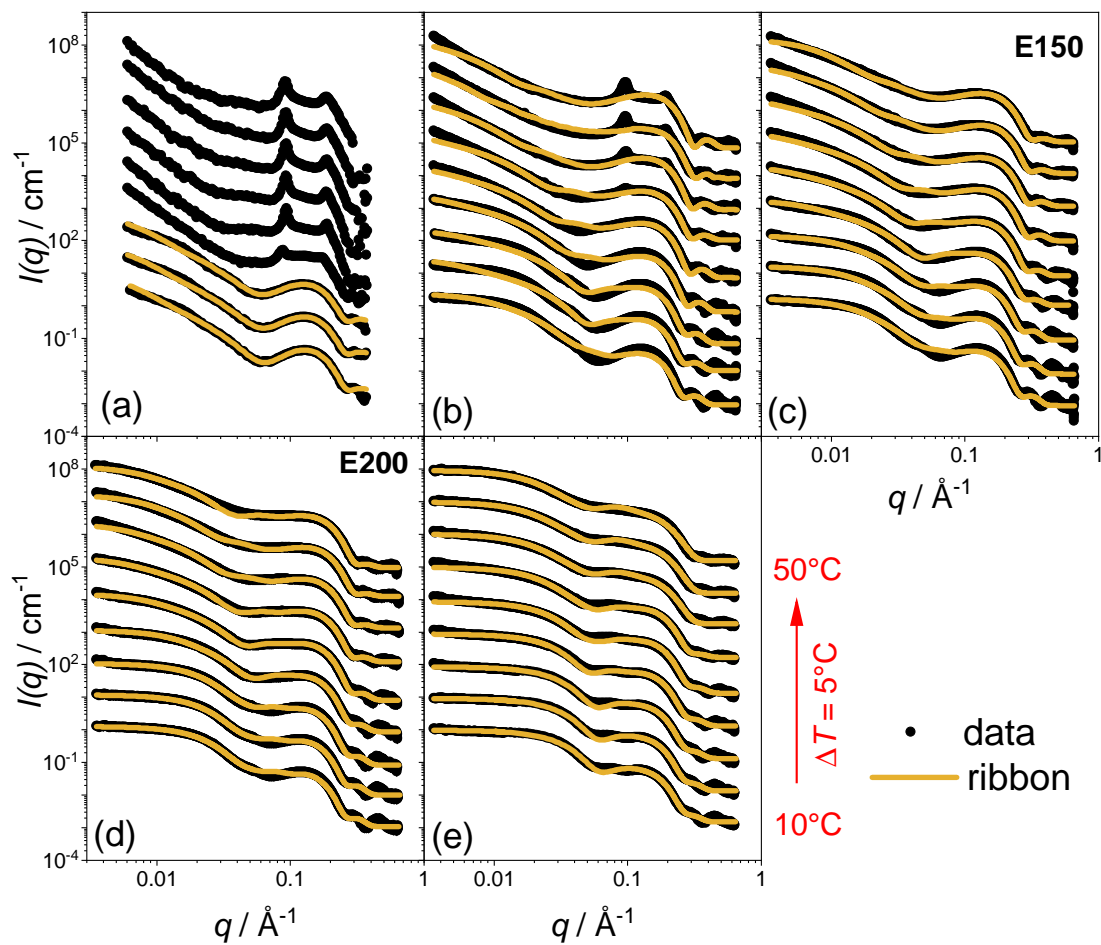

**Fig. S3** SAXS curves of samples with (a) 7 mol% , (b) 10 mol%, (c) 15 mol%, (d) 20 mol%, and (e) 30 mol%  $\beta$ -aescin at temperatures from 10-50 °C (red numbers) in steps of 5 °C. Solid lines are model fits to the data (black dots). Orange: *extended bilayer (polydisperse ribbon)* model. The SAXS curves are scaled by multiples of 10 from bottom ( $10^0$  @ 10 °C) to top ( $10^8$  @ 50 °C). The legend and temperatures apply to all panels. The samples of E070 (panel (a)) were measured at the XEUSS instrument, all other samples at the ID02 beamline.
